# Supplementary material for: Analysis of the Diet Quality and Nutritional State of Children, Youth, and Young Adults with Prader–Willi Syndrome: A Polish Multiple Case Study
Source: MDPI journal article supplement (doi:10.3390/nu15173811), 2023-08-31
Supplement: s1 [file s1]

---

**Table S1.** Nutritional status in the studied group – supplementary data

| No. | Body<br>mass<br>[kg] | Height<br>[cm] | BMI<br>[kg/m <sup>2</sup> ] | PAL  |
|-----|----------------------|----------------|-----------------------------|------|
| 1.  | 68.0                 | 175.0          | 22.2                        | 1.6  |
| 2.  | 53.6                 | 175.2          | 17.4                        | 1.6  |
| 3.  | 69.1                 | 162.2          | 26.4                        | 1.4  |
| 4.  | 46.2                 | 156.0          | 19.0                        | 1.6  |
| 5.  | 35.5                 | 152.0          | 15.4                        | 1.6  |
| 6.  | 39.3                 | 147.8          | 18.2                        | 1.75 |
| 7.  | 32.0                 | 135.0          | 17.6                        | 1.6  |
| 8.  | 12.3                 | 90.4           | 16.9                        | 1.6  |
| 9.  | 28.2                 | 137.5          | 14.9                        | 1.6  |
| 10. | 76.0                 | 182.0          | 23.0                        | 1.6  |
| 11. | 11.7                 | 86.0           | 15.8                        | 1.75 |
| 12. | 53.0                 | 160.0          | 20.7                        | 1.75 |
| 13. | 17.9                 | 109.0          | 15.0                        | 1.75 |
| 14. | 69.9                 | 153.0          | 29.9                        | 1.4  |
| 15. | 77.0                 | 173.0          | 25.8                        | 1.6  |
| 16. | 21.5                 | 119.0          | 15.1                        | 1.75 |
| 17. | 104.2                | 167.0          | 37.3                        | 1.4  |
| 18. | 50.0                 | 160.0          | 19.5                        | 1.6  |
| 19. | 128.0                | 165.0          | 47.0                        | 1.4  |
| 20. | 40.7                 | 163.5          | 15.2                        | 1.6  |

**Table S2.** Recommended intake of energy and macronutrients in subjects with PWS – supplementary data

|            | <b>Protein</b>    | <b>Fat</b>     | <b>SFA</b>    | <b>Carbohydrates</b> | <b>Fiber</b> |
|------------|-------------------|----------------|---------------|----------------------|--------------|
| <b>No.</b> | <b>10-20% EER</b> | <b>20-35%</b>  | <b>6% EER</b> | <b>45 – 65 % EER</b> | <b>AI</b>    |
|            | <b>[g]</b>        | <b>EER [g]</b> | <b>[g]</b>    | <b>[g]</b>           | <b>[g]</b>   |
| 1          | 49.7 - 99.4       | 44.2 – 77.3    | 13,3          | 224 - 323            | 25           |
| 2          | 63.8 – 127.5      | 56.7 – 99.2    | 17,0          | 287 – 414            | 25           |
| 3          | 39.4 – 78.8       | 35.0 – 61.3    | 10,5          | 177 – 256            | 21           |
| 4          | 56.3 – 112.5      | 50.0 – 87.5    | 15,0          | 253 – 366            | 19           |
| 5          | 44.1 – 88.2       | 39.2 – 68.6    | 11,8          | 198 – 287            | 19           |
| 6          | 46.0 – 91.9       | 40.8 – 71.5    | 12,3          | 207 – 299            | 19           |
| 7          | 44.1 – 88.2       | 39.2 – 68.6    | 11,8          | 198 – 287            | 19           |
| 8          | 26.3 – 52.5       | 23.3 – 40.8    | 7,0           | 118 – 171            | 14           |
| 9          | 44.1 – 88.2       | 39.2 – 68.6    | 11,8          | 198 – 287            | 16           |
| 10         | 54.4 – 108.8      | 48.3 – 84.6    | 14,5          | 245 – 353            | 25           |
| 11         | 18.8 – 37.5       | 16.7 – 29.2    | 5,0           | 84 – 122             | 10           |
| 12         | 30.6-61.3         | 27.2 – 47.6    | 8,2           | 138 – 199            | 25           |
| 13         | 26.3 – 52.5       | 23.3 – 40.8    | 7,0           | 118 – 171            | 14           |
| 14         | 33.8 – 67.5       | 30.0 – 52.5    | 9,0           | 152 – 219            | 25           |
| 15         | 49.7 – 99.4       | 44.2 – 77.3    | 13,3          | 224 – 323            | 25           |
| 16         | 39.4 – 78.8       | 35.0 – 61.3    | 10,5          | 177 – 256            | 16           |
| 17         | 25.6 – 51.3       | 22.8 – 39.9    | 6,8           | 115 – 167            | 25           |
| 18         | 39.4 – 78.8       | 35.0 – 61.3    | 10,5          | 177 – 256            | 19           |
| 19         | 26.3 – 52.5       | 23.3 – 40.8    | 7,0           | 118 – 171            | 25           |
| 20         | 56.3 – 112.5      | 50,0 – 87.5    | 15,0          | 253 - 366            | 21           |

**Table S3.** Recommended intake of selected vitamins in subjects with PWS – supplementary data

| No. | Vitamin<br>B <sub>1</sub><br>MJ | Vitamin<br>B <sub>1</sub><br>EAR<br>[mg] | Vitamin<br>B <sub>2</sub><br>EAR<br>[mg] | Vitamin<br>B <sub>3</sub><br>EAR<br>[mg] | Vitamin<br>B <sub>6</sub><br>EAR<br>[mg] | Folic<br>acid<br>EAR<br>[μg] | Vitamin<br>B <sub>12</sub><br>EAR<br>[μg] | Vitamin<br>C<br>EAR<br>[mg] | Vitamin A<br>(retinol<br>equivalent)<br>EAR [μg] | Vitamin<br>D<br>AI [μg] | Vitamin<br>E<br>AI [mg] |
|-----|---------------------------------|------------------------------------------|------------------------------------------|------------------------------------------|------------------------------------------|------------------------------|-------------------------------------------|-----------------------------|--------------------------------------------------|-------------------------|-------------------------|
| 1   | 9.8                             | 0.71                                     | 1.3                                      | 12.7                                     | 1.5                                      | 250                          | 4.0                                       | 90                          | 570                                              | 15                      | 13                      |
| 2   | 9.8                             | 0.71                                     | 1.3                                      | 12.7                                     | 1.5                                      | 250                          | 4.0                                       | 90                          | 570                                              | 15                      | 13                      |
| 3   | 9.3                             | 0.67                                     | 1.4                                      | 12.1                                     | 1.3                                      | 250                          | 4.0                                       | 75                          | 490                                              | 15                      | 11                      |
| 4   | 8.6                             | 0.62                                     | 1.1                                      | 11.2                                     | 1.2                                      | 210                          | 3.5                                       | 60                          | 480                                              | 15                      | 13                      |
| 5   | 7.4                             | 0.53                                     | 1.1                                      | 9.6                                      | 1.2                                      | 210                          | 3.5                                       | 60                          | 480                                              | 15                      | 13                      |
| 6   | 7.0                             | 0.50                                     | 1.1                                      | 9.1                                      | 1.2                                      | 210                          | 3.5                                       | 60                          | 480                                              | 15                      | 11                      |
| 7   | 7.4                             | 0.53                                     | 1.1                                      | 9.6                                      | 1.2                                      | 210                          | 3.5                                       | 60                          | 480                                              | 15                      | 13                      |
| 8   | 4.9                             | 0.35                                     | 0.6                                      | 6.4                                      | 0.6                                      | 110                          | 1.5                                       | 25                          | 245                                              | 15                      | 9                       |
| 9   | 7.1                             | 0.51                                     | 0.8                                      | 9.2                                      | 0.9                                      | 160                          | 2.5                                       | 40                          | 320                                              | 15                      | 13                      |
| 10  | 9.8                             | 0.71                                     | 1.3                                      | 12.7                                     | 1.5                                      | 250                          | 4.0                                       | 90                          | 570                                              | 15                      | 13                      |
| 11  | 4.6                             | 0.33                                     | 0.5                                      | 6.0                                      | 0.5                                      | 90                           | 1.5                                       | 15                          | 205                                              | 15                      | 6                       |
| 12  | 9.8                             | 0.71                                     | 1.3                                      | 12.7                                     | 1.5                                      | 250                          | 4.0                                       | 90                          | 570                                              | 15                      | 13                      |
| 13  | 5.9                             | 0.42                                     | 0.6                                      | 7.7                                      | 0.6                                      | 110                          | 1.5                                       | 25                          | 245                                              | 15                      | 9                       |
| 14  | 7.9                             | 0.57                                     | 1.3                                      | 10.3                                     | 1.3                                      | 250                          | 4.0                                       | 80                          | 490                                              | 15                      | 11                      |
| 15  | 9.8                             | 0.71                                     | 1.3                                      | 12.7                                     | 1.5                                      | 250                          | 4.0                                       | 90                          | 570                                              | 15                      | 13                      |
| 16  | 6.3                             | 0.45                                     | 0.8                                      | 8.2                                      | 0.9                                      | 160                          | 2.5                                       | 40                          | 320                                              | 15                      | 9                       |
| 17  | 7.9                             | 0.57                                     | 1.3                                      | 10.3                                     | 1.3                                      | 250                          | 4.0                                       | 80                          | 490                                              | 15                      | 11                      |
| 18  | 7.6                             | 0.53                                     | 1.1                                      | 9.6                                      | 1.2                                      | 210                          | 3.5                                       | 60                          | 480                                              | 15                      | 11                      |
| 19  | 9.8                             | 0.71                                     | 1.3                                      | 12.7                                     | 1.5                                      | 250                          | 4.0                                       | 90                          | 570                                              | 15                      | 13                      |
| 20  | 9.9                             | 0.71                                     | 1.4                                      | 12.9                                     | 1.5                                      | 250                          | 4.0                                       | 85                          | 580                                              | 15                      | 13                      |

---

**Table S4.** Recommended intake of selected minerals in subjects with PWS – supplementary data

|     | Sodium | Potassium | Calcium | Phosphorus | Magnesium | Iron | Zinc | Copper | Iodine |
|-----|--------|-----------|---------|------------|-----------|------|------|--------|--------|
| No. | AI     | AI        | EAR     | AI         | AI        | EAR  | EAR  | AI     | AI     |
|     | [mg]   | [mg]      | [mg]    | [mg]       | [mg]      | [mg] | [mg] | [mg]   | [mg]   |
| 1   | 2000   | 3500      | 860     | 550        | 350       | 6.0  | 9.3  | 1.6    | 150    |
| 2   | 2000   | 3500      | 860     | 550        | 350       | 6.0  | 9.3  | 1.6    | 150    |
| 3   | 2000   | 3500      | 860     | 640        | 250       | 7.0  | 9.9  | 1.1    | 130    |
| 4   | 2000   | 2700      | 960     | 640        | 300       | 8.0  | 8.9  | 1.3    | 120    |
| 5   | 2000   | 2700      | 960     | 640        | 300       | 8.0  | 8.9  | 1.3    | 120    |
| 6   | 2000   | 2700      | 960     | 640        | 250       | 8.0  | 8.9  | 1.1    | 120    |
| 7   | 2000   | 2700      | 960     | 640        | 300       | 8.0  | 8.9  | 1.3    | 120    |
| 8   | 1300   | 1100      | 680     | 440        | 230       | 5.0  | 4.6  | 1.0    | 90     |
| 9   | 1700   | 1800      | 680     | 440        | 300       | 8.0  | 6.2  | 1.3    | 90     |
| 10  | 2000   | 3500      | 860     | 550        | 350       | 6.0  | 9.3  | 1.6    | 150    |
| 11  | 1100   | 800       | 390     | 250        | 170       | 5.0  | 3.6  | 0.7    | 90     |
| 12  | 2000   | 3500      | 750     | 550        | 350       | 6.0  | 9.3  | 1.6    | 150    |
| 13  | 1300   | 1100      | 680     | 440        | 230       | 5.0  | 4.6  | 1.0    | 90     |
| 14  | 2000   | 3500      | 860     | 550        | 300       | 7.0  | 7.6  | 1.3    | 150    |
| 15  | 2000   | 3500      | 860     | 550        | 350       | 6.0  | 9.3  | 1.6    | 150    |
| 16  | 1700   | 1800      | 680     | 440        | 230       | 8.0  | 6.2  | 1.0    | 90     |
| 17  | 2000   | 3500      | 860     | 550        | 300       | 7.0  | 7.6  | 1.3    | 150    |
| 18  | 2000   | 2700      | 960     | 640        | 250       | 7.0  | 8.9  | 1.1    | 120    |
| 19  | 2000   | 3500      | 750     | 550        | 350       | 6.0  | 9.3  | 1.6    | 150    |
| 20  | 2000   | 3500      | 960     | 640        | 300       | 8.0  | 11.8 | 1.3    | 130    |
